# Supplementary material for: Effectiveness and Safety of Palivizumab for the Prevention of Serious Lower Respiratory Tract Infection Caused by Respiratory Syncytial Virus: A Systematic Review
Source: PubMed Central journal article supplement — Am J Perinatol. 2023 Jan 18;41(Suppl 1):e1107–15. doi: 10.1055/a-1990-2633 (PMC11108679; doi:10.1055/a-1990-2633), 2023-01-18
Supplement: 10-1055-a-1990-2633-s22jun1326.pdf [file 10-1055-a-1990-2633-s22jun1326.pdf]

| <b>Supplementary Table S1</b> Literature search strategies in Medline and Embase (date last searched: September 7, 2021) |                                                                                                                                                                                                                                                                                                                                                                                  |           |
|--------------------------------------------------------------------------------------------------------------------------|----------------------------------------------------------------------------------------------------------------------------------------------------------------------------------------------------------------------------------------------------------------------------------------------------------------------------------------------------------------------------------|-----------|
| No.                                                                                                                      | Searches                                                                                                                                                                                                                                                                                                                                                                         | Results   |
| Medline                                                                                                                  |                                                                                                                                                                                                                                                                                                                                                                                  |           |
| 1                                                                                                                        | Palivizumab/ or (synagis).ab,ti,kw                                                                                                                                                                                                                                                                                                                                               | 831       |
| 2                                                                                                                        | Hospitalization/OR Treatment outcome/OR Pneumonia/OR Bronchiolitis/OR Respiratory Syncytial Virus Infections/OR Anaphylaxis/OR Thrombocytopenia/OR Hypersensitivity/OR (safety or effectiveness or efficacy or hospitalization or hospital admission* or adverse event* or immunogenicity or mechanical ventilation or pneumonia or bronchiolitis or hypersensitivity).ab,ti,kw. | 2,988,863 |
| 3                                                                                                                        | ((hospitalized or hospitalization*) adj5 (rate or rates or incidence or prevalence or percent* or number* or epidemiology)).ab,ti.                                                                                                                                                                                                                                               | 26,753    |
| 4                                                                                                                        | 2 OR 3                                                                                                                                                                                                                                                                                                                                                                           | 2,999,164 |
| 5                                                                                                                        | 1 AND 4                                                                                                                                                                                                                                                                                                                                                                          | 787       |
| 6                                                                                                                        | limit 7 to (abstracts and Humans)                                                                                                                                                                                                                                                                                                                                                | 604       |
| Embase                                                                                                                   |                                                                                                                                                                                                                                                                                                                                                                                  |           |
| 1                                                                                                                        | Palivizumab/or (synagis).ab,ti,kw                                                                                                                                                                                                                                                                                                                                                | 3,084     |
| 2                                                                                                                        | Hospitalization/OR Treatment outcome/OR Pneumonia/OR Bronchiolitis/OR Respiratory Syncytial Virus Infection/OR Anaphylaxis/OR Thrombocytopenia/OR Hypersensitivity/OR Adverse event/OR Adverse drug reaction/OR (safety or effectiveness or efficacy or hospitalization or hospital admission* or immunogenicity or mechanical ventilation).ab,ti,kw                             | 4,095,633 |
| 3                                                                                                                        | ((hospitalized or hospitalization*) adj5 (rate or rates or incidence or prevalence or percent* or number* or epidemiology)).ab,ti.                                                                                                                                                                                                                                               | 44,927    |
| 4                                                                                                                        | 2 OR 3                                                                                                                                                                                                                                                                                                                                                                           | 4,104,988 |
| 5                                                                                                                        | 1 AND 4                                                                                                                                                                                                                                                                                                                                                                          | 2,088     |
| 6                                                                                                                        | limit 7 to (abstracts and humans)                                                                                                                                                                                                                                                                                                                                                | 1,646     |

**Supplementary Table S2** Characteristics, key findings, and methodological quality assessment of clinical trials included in the systematic review (five studies)

| Study                                                           | Country/study period                                           | Type of population and number of patients                                                                             | Palivizumab regimen                           | Key efficacy findings                                                                                                                                                                                                                                                                                                                                                                                                                                 | Key safety findings                                                                                               | Methodological quality assessment |
|-----------------------------------------------------------------|----------------------------------------------------------------|-----------------------------------------------------------------------------------------------------------------------|-----------------------------------------------|-------------------------------------------------------------------------------------------------------------------------------------------------------------------------------------------------------------------------------------------------------------------------------------------------------------------------------------------------------------------------------------------------------------------------------------------------------|-------------------------------------------------------------------------------------------------------------------|-----------------------------------|
| Phase III RCT<br>Connor, 1998<br>IMPact-RSV trial <sup>12</sup> | Canada, the United Kingdom, and the United States<br>1996–1997 | Premature infants<br>• Palivizumab: 506<br>• Placebo: 234<br>Infants with BPD<br>• Palivizumab: 496<br>• Placebo: 266 | Five doses of palivizumab 15 mg/kg every 30 d | Rate of RSV-related hospitalization<br>Premature infants<br>• Palivizumab: 1.8%<br>• Placebo: 8.1%<br>$p < 0.001$<br>78% reduction in RSV-related hospitalizations ( $p = 0.001$ )<br>Infants with BPD<br>• Palivizumab: 7.9%<br>• Placebo: 12.8%<br>$p < 0.001$<br>39% reduction in RSV-related hospitalizations ( $p = 0.038$ )<br>RSV-related mortality<br>Premature infants<br>• Palivizumab: 0.2%<br>• Placebo: 0%<br>( $p$ -value not provided) | All patients<br>AEs<br>• Palivizumab: 11%<br>• Placebo: 10%<br>No SAEs were reported                              | Low risk of bias                  |
| Carbonell-Estrany et al, 2010 <sup>13</sup>                     | Multinational 2004–2006                                        | Infants with BPD<br>- Palivizumab: 723<br>- Motavizumab: 722                                                          | Five doses of palivizumab 15 mg/kg every 30 d | Rate of RSV-related hospitalization<br>• Palivizumab: 3.9%<br>• Motavizumab: 3.0%                                                                                                                                                                                                                                                                                                                                                                     | Palivizumab:<br>86.0% experienced more than one AE<br>Psychiatric AEs: 2.9%<br>15.3% developed more than one SAEs | Low risk of bias                  |
| Feltes et al, 2003 <sup>14</sup>                                | Multinational 1998–2002                                        | Infants with hs-CHD<br>• Palivizumab: 639<br>• Placebo: 648                                                           | Five doses of palivizumab 15 mg/kg every 30 d | Rate of RSV-related hospitalization<br>• Palivizumab: 5.3%<br>• Placebo: 9.7%<br>Relative reduction in RSV-related hospitalization of 45% (95% CI, 23–67) $p = 0.003$<br>Rate of ICU admission<br>• Palivizumab: 38.2%<br>• Placebo: 38.1%<br>Mechanical ventilation<br>• Palivizumab: 23.5%<br>• Placebo: 22.2%<br>RSV-related mortality<br>• Palivizumab: 0.3%<br>• Placebo: 0.6%<br>( $p$ -value not provided)                                     | AEs<br>• Palivizumab: 7.2%<br>• Placebo: 6.9%<br>$p = 0.914$<br>SAEs<br>• Palivizumab: 0%<br>• Placebo: 0.5%      | Low risk of bias                  |

(Continued)

**Supplementary Table S2** (Continued)

| Study                            | Country/study period        | Type of population and number of patients                                                        | Palivizumab regimen | Key efficacy findings | Key safety findings                         | Methodological quality assessment |
|----------------------------------|-----------------------------|--------------------------------------------------------------------------------------------------|---------------------|-----------------------|---------------------------------------------|-----------------------------------|
| Phase II/III RCT                 |                             |                                                                                                  |                     |                       |                                             |                                   |
| Turti et al, 2012 <sup>15</sup>  | Russia 2009–2010            | 100                                                                                              | NR                  | NR                    | AEs: 3.0%                                   | Low risk of bias                  |
| Phase-IV nonrandomized trial     |                             |                                                                                                  |                     |                       |                                             |                                   |
| Makari et al, 2014 <sup>16</sup> | The United States 2005–2007 | Premature infants (<35 WGA and age ≤6 mo or infants with BPD of prematurity and age ≤24 mo): 413 | NR                  | NR                    | One patient (0.3%) developed immunogenicity | Low risk of bias                  |

Abbreviations: AE, adverse event; BPD, bronchopulmonary dysplasia; CI, confidence interval; hs-CHD, hemodynamically significant congenital heart disease; NR, not reported; RSV, respiratory syncytial virus; SAE, serious adverse events; US, United States; WGA, weeks gestational age.

**Supplementary Table S3** Characteristics, key findings, and methodological quality assessment of observational studies included in the systematic review (55 studies)

| Study                                | Country/study period             | Type of population and number of patients                                                                                                              | Key effectiveness findings                                                                                                                                                                                                                                                                                                                                                                                                                     | Key safety findings                | Methodological quality score                  |
|--------------------------------------|----------------------------------|--------------------------------------------------------------------------------------------------------------------------------------------------------|------------------------------------------------------------------------------------------------------------------------------------------------------------------------------------------------------------------------------------------------------------------------------------------------------------------------------------------------------------------------------------------------------------------------------------------------|------------------------------------|-----------------------------------------------|
| <b>Ambispective cohort</b>           |                                  |                                                                                                                                                        |                                                                                                                                                                                                                                                                                                                                                                                                                                                |                                    |                                               |
| Abushahin et al, 2018 <sup>17</sup>  | Qatar (November 2009–March 2012) | All infants: 429<br>• Premature ( $\leq 35$ Wga): 300<br>• BPD: 80<br>• - hs-CHD: 49                                                                   | RSV-related hospitalization rate<br>• 2009–2010: 2.1%<br>• 2010–2011: 1.2%<br>• 2011–2012: 1.6%<br>RSV-related ICU admission 14.3%                                                                                                                                                                                                                                                                                                             | NR                                 | JBIC Checklist for Cohort Studies: 6          |
| Chi et al, 2014 <sup>18</sup>        | Taiwan (July 2000–March 2013)    | After matching:<br>• Palivizumab<br>◦ All infants: 127<br>◦ BPD: 100<br>◦ CHD: 10<br>• No palivizumab<br>◦ All infants: 127<br>◦ BPD: 101<br>◦ CHD: 11 | RSV-related hospitalization rate<br>Premature, at 6 mo:<br>• Palivizumab: 0.9%<br>• No palivizumab: 10.4%<br>$p = 0.007$<br>Premature, at 12 mo:<br>• Palivizumab: 3.7%<br>• No palivizumab: 16.0%<br>$p = 0.005$<br>BPD patients, at 6 mo:<br>• Palivizumab: 2.0%<br>• No palivizumab: 9.9%<br>$p = 0.039$<br>BPD patients, at 12 mo:<br>• Palivizumab: 4.0%<br>• No palivizumab: 16.8%<br>$p = 0.006$<br>No RSV-related deaths were reported | AEs<br>6.4%<br>Serious AEs<br>0.3% | JBIC Checklist for Cohort Studies: 8          |
| Resch et al, 2006 <sup>19</sup>      | Austria (2001–2003)              | All infants: 801<br>• BPD: 32<br>• hsCHD: 19                                                                                                           | RSV-related hospitalization rate<br>• Adequate palivizumab prophylaxis: 3.3%<br>• Inadequate palivizumab prophylaxis: 8.1%<br>$p = 0.07$<br>Inadequate prophylaxis defined as receiving only one injection                                                                                                                                                                                                                                     | NR                                 | Not applicable                                |
| <b>Case-control study</b>            |                                  |                                                                                                                                                        |                                                                                                                                                                                                                                                                                                                                                                                                                                                |                                    |                                               |
| Viguria et al, 2021 <sup>20</sup>    | Spain (2011–2019)                | • RSV-positive: 35<br>• RSV-negative: 107                                                                                                              | Effectiveness of palivizumab<br>• Any dose of palivizumab: 82% (95% CI, 29–96), $p = 0.0102$<br>- Palivizumab dose in prior 30 d vs. none: 79% (95% CI, 16–96), $p = 0.0234$<br>Calculated as (1-OR)X100. Logistic regression analysis adjusted by age group (0–5, 6–11, 12–23 mo) and health care setting (outpatient or hospitalization)                                                                                                     | NR                                 | JBIC Checklist for Case-Control Studies: 8    |
| <b>Cross-sectional study</b>         |                                  |                                                                                                                                                        |                                                                                                                                                                                                                                                                                                                                                                                                                                                |                                    |                                               |
| de Souza et al, 2019 <sup>21</sup>   | Brazil (January 2016–June 2016)  | hs-CHD: 104                                                                                                                                            | RSV-related hospitalization rate 0%                                                                                                                                                                                                                                                                                                                                                                                                            | NR                                 | JBIC Checklist for Cross-Sectional Studies: 5 |
| Bar-Yoseph et al, 2019 <sup>22</sup> | Israel (2007–2017)               | All infants: 42<br>• Palivizumab: 27<br>• No palivizumab: 15                                                                                           | Long-term morbidity<br>Similar rates of recurrent wheezing, coughing, nighttime wheezing, exercise-induced wheezing, stridor, and recurrent pneumonia<br>Differences in dyspnea ( $p = 0.056$ ):<br>• Palivizumab: 52%                                                                                                                                                                                                                         | NR                                 | JBIC Checklist for Cohort Studies: 5          |

(Continued)

Supplementary Table S3 (Continued)

| Study                            | Country/study period                     | Type of population and number of patients                               | Key effectiveness findings                                                                                                                                                                                                                                                                                                                                                                                                                                                                                                                                                                                                                                                                   | Key safety findings                                                                                    | Methodological quality score                 |
|----------------------------------|------------------------------------------|-------------------------------------------------------------------------|----------------------------------------------------------------------------------------------------------------------------------------------------------------------------------------------------------------------------------------------------------------------------------------------------------------------------------------------------------------------------------------------------------------------------------------------------------------------------------------------------------------------------------------------------------------------------------------------------------------------------------------------------------------------------------------------|--------------------------------------------------------------------------------------------------------|----------------------------------------------|
| Kusuda et al, 2006 <sup>23</sup> | Japan (2002–2003)                        | All infants: 6,302<br>• Palivizumab: 2,806<br>• - No palivizumab: 3,496 | <ul style="list-style-type: none"> <li>No palivizumab: 20%</li> <li>Differences in snoring (<math>p = 0.016</math>):</li> <li>Palivizumab: 7%</li> <li>No palivizumab: 40%</li> </ul>                                                                                                                                                                                                                                                                                                                                                                                                                                                                                                        | NR                                                                                                     | JBI Checklist for Cross-Sectional Studies: 6 |
| Prais et al, 2016 <sup>24</sup>  | Israel (period not reported)             | BPD: 63<br>• Palivizumab: 30<br>• No palivizumab: 33                    | <ul style="list-style-type: none"> <li>RSV-related hospitalization rate</li> <li>Palivizumab: 6.7%</li> <li>No palivizumab: 57.6%</li> <li><math>p = 0.033</math></li> <li>Parent-reported wheezing episodes</li> <li>During the first 2 years of life:</li> <li>Palivizumab: 26.7%</li> <li>No palivizumab: 69.7%</li> <li><math>p = 0.008</math></li> <li>During the year preceding study enrollment:</li> <li>Palivizumab: 13.3%</li> <li>No palivizumab: 18.2%</li> <li>Not significant</li> <li>Upper respiratory tract infection, during the year preceding study enrollment:</li> <li>Palivizumab: 30.0%</li> <li>No palivizumab: 69.7%</li> <li><math>p &lt; 0.005</math></li> </ul> | NR                                                                                                     | JBI Checklist for Cross-Sectional Studies: 6 |
| Phase III/IV open label study    |                                          |                                                                         |                                                                                                                                                                                                                                                                                                                                                                                                                                                                                                                                                                                                                                                                                              |                                                                                                        |                                              |
| Groothuis, 2001 <sup>25</sup>    | Multinational (November 1998–March 1999) | 565                                                                     | No RSV-related deaths were reported                                                                                                                                                                                                                                                                                                                                                                                                                                                                                                                                                                                                                                                          | NR                                                                                                     | Not applicable (Conference abstract)         |
| Phase IV open label study        |                                          |                                                                         |                                                                                                                                                                                                                                                                                                                                                                                                                                                                                                                                                                                                                                                                                              |                                                                                                        |                                              |
| Groothuis, 2003 <sup>26</sup>    | Europe, Saudi Arabia (2000–2001)         | Premature: 285                                                          | <ul style="list-style-type: none"> <li>RSV-related hospitalization rate</li> <li>2.1%</li> <li>RSV-related ICU admission</li> <li>33.3%</li> <li>Mechanical ventilation</li> <li>33.3%</li> </ul>                                                                                                                                                                                                                                                                                                                                                                                                                                                                                            | <ul style="list-style-type: none"> <li>AEs</li> <li>2.1%</li> <li>Serious AEs</li> <li>1.4%</li> </ul> | JBI Checklist for Case Series: 6             |
| Prospective cohort study         |                                          |                                                                         |                                                                                                                                                                                                                                                                                                                                                                                                                                                                                                                                                                                                                                                                                              |                                                                                                        |                                              |
| Paes et al, 2012 <sup>27</sup>   | Canada (October 2006–May 2011)           | All infants: 6,654<br>• $\leq 32$ WGA: 5,183<br>• 33–35 WGA: 1,471      | <ul style="list-style-type: none"> <li>RSV-related hospitalization rate</li> <li>1.5%</li> <li>RSV-related ICU admission</li> <li><math>\leq 32</math> WGA: 25.8%</li> <li>33–35 WGA: 27.8%</li> <li><math>p = 1.000</math></li> <li>Mechanical ventilation</li> <li>13.7%</li> </ul>                                                                                                                                                                                                                                                                                                                                                                                                        | NR                                                                                                     | JBI Checklist for Cohort Studies: 6          |
| Li et al, 2017 <sup>28</sup>     | Canada (2005–2015)                       | hs-CHD: 1,909                                                           | RSV-related hospitalization rate                                                                                                                                                                                                                                                                                                                                                                                                                                                                                                                                                                                                                                                             | NR                                                                                                     | JBI Checklist for Cohort Studies: 8          |

Supplementary Table S3 (Continued)

| Study                                       | Country/study period                     | Type of population and number of patients                      | Key effectiveness findings                                                                                                                                                                                                                                                                                                                                                                                                                                        | Key safety findings | Methodological quality score         |
|---------------------------------------------|------------------------------------------|----------------------------------------------------------------|-------------------------------------------------------------------------------------------------------------------------------------------------------------------------------------------------------------------------------------------------------------------------------------------------------------------------------------------------------------------------------------------------------------------------------------------------------------------|---------------------|--------------------------------------|
| Yoshihara et al, 2013 <sup>29</sup>         | Japan (April 2008–December 2008)         | All infants: 444<br>• Palivizumab: 349<br>• No palivizumab: 95 | RSV-related ICU admission<br>• First year of life: 33.3%<br>• Second year of life: 42.9%<br>$p=0.677$<br>Mechanical ventilation<br>• First year of life: 25.9%<br>• Second year of life: 0%<br>$p=0.300$                                                                                                                                                                                                                                                          | NR                  | JBI Checklist for Cohort Studies: 8  |
| Han et al, 2015 <sup>30</sup>               | South Korea (September 2007–April 2008)  | BPD: 90                                                        | Physician-diagnosed recurrent wheezing 6.4%<br>RR: 0.34 (95% CI, 0.19–0.60)                                                                                                                                                                                                                                                                                                                                                                                       | NR                  | JBI Checklist for Case Series: 8     |
| Lacaze-Masmonteil et al, 2002 <sup>31</sup> | France (September 1999–January 2000)     | All infants: 516<br>• BPD: 400                                 | RSV-related hospitalization rate 8.9%<br>Mechanical ventilation 25.0%<br>RSV-related mortality 1.1% (among infants with BPD and history of premature birth [ $\leq 35$ WGA] and low birth weight [ $\leq 1,500$ g])                                                                                                                                                                                                                                               | NR                  | JBI Checklist for Case Series: 5     |
| Charkaluk et al, 2021 <sup>32</sup>         | France (April 2011–December 2011)        | 2,571                                                          | RSV-related hospitalization rate 9.0%<br>No RSV-related deaths were reported<br>Oxygen requirement<br>Adjusted OR (95% CI) (ref: No palivizumab):<br>• Incomplete treatment: 1.9 (0.5–6.6)<br>• Complete treatment: 1.3 (0.5–3.4)<br>Multivariate model adjusted for GA and factors associated with the outcome with $p < 0.20$ on univariate analysis<br>Complete treatment: at least one dose for each month of RSV exposure in the community, up to five doses | NR                  | JBI Checklist for Cohort Studies: 8  |
| Manzoni et al, 2017 <sup>33</sup>           | Canada, Italy (2001–2014)                | Premature: 9,093<br>• BPD: 1,199<br>• hs-CHD: 1,438            | RSV-related hospitalization rate<br>• BPD: 4.8%<br>• hs-CHD: 4.1%<br>RSV-related ICU admission<br>• Premature: 16.6%<br>• BPD: 7.0%<br>• hs-CHD: 23.7%<br>Mechanical ventilation<br>• Premature: 13.7%<br>• BPD: 7.0%<br>• hs-CHD: 22.0%                                                                                                                                                                                                                          | NR                  | JBI Checklist for Cohort Studies: 7  |
| Amitai et al, 2020 <sup>34</sup>            | Israel (period not reported)             | BPD: 46<br>• Palivizumab: 17<br>• No palivizumab: 29           | Lung function parameters<br>No statistically significant differences were observed between palivizumab and nonpalivizumab groups in adolescents aged 13–18 years who were born at $< 29$ WGA                                                                                                                                                                                                                                                                      | NR                  | JBI Checklist for Cohort Studies: 6  |
| Athiraman and Agarwal, 2012 <sup>35</sup>   | The United Kingdom (period not reported) | BPD: 229<br>• Palivizumab: 166                                 | RSV-related hospitalization rate 8.5%                                                                                                                                                                                                                                                                                                                                                                                                                             | NR                  | Not applicable (Conference abstract) |
| Soraiz et al, 2017 <sup>36</sup>            |                                          |                                                                | No RSV-related deaths were reported                                                                                                                                                                                                                                                                                                                                                                                                                               | NR                  |                                      |

(Continued)

Supplementary Table S3 (Continued)

| Study                                     | Country/study period                          | Type of population and number of patients                                                                                                                                                                                                                                                                                                                                                          | Key effectiveness findings                                                                                                                                                                                                                                                                                                                                             | Key safety findings | Methodological quality score                                                                                                                                                                                                                                                                                                                                           |
|-------------------------------------------|-----------------------------------------------|----------------------------------------------------------------------------------------------------------------------------------------------------------------------------------------------------------------------------------------------------------------------------------------------------------------------------------------------------------------------------------------------------|------------------------------------------------------------------------------------------------------------------------------------------------------------------------------------------------------------------------------------------------------------------------------------------------------------------------------------------------------------------------|---------------------|------------------------------------------------------------------------------------------------------------------------------------------------------------------------------------------------------------------------------------------------------------------------------------------------------------------------------------------------------------------------|
| Oh et al, 2002 <sup>37</sup>              | Argentina (2014–2016)                         | <ul style="list-style-type: none"> <li>hs-CHD: 103</li> <li>Historical cohort (i.e., did not receive treatment): 50</li> <li>Palivizumab group: 53</li> </ul>                                                                                                                                                                                                                                      | <ul style="list-style-type: none"> <li>RSV-related hospitalization rate</li> <li>Premature: 1.2%</li> <li>BPD: 2.9%</li> </ul>                                                                                                                                                                                                                                         | NR                  | Not applicable (Conference abstract)                                                                                                                                                                                                                                                                                                                                   |
| Mochizuki et al, 2017 <sup>38</sup>       | Canada (September 1999–May 2000)              | <ul style="list-style-type: none"> <li>All infants: 480</li> <li>Premature: 345</li> <li>BPD: 40</li> </ul>                                                                                                                                                                                                                                                                                        | <ul style="list-style-type: none"> <li>Physician-diagnosed recurrent wheezing: 12.8%</li> <li>Atopic asthma: 15.3%, No significant risk reduction associated with the use of palivizumab</li> </ul>                                                                                                                                                                    | NR                  | <ul style="list-style-type: none"> <li>Physician-diagnosed recurrent wheezing: 12.8%</li> <li>Atopic asthma: 15.3%, No significant risk reduction associated with the use of palivizumab</li> </ul>                                                                                                                                                                    |
| Parnes et al, 2003 <sup>39</sup>          | Japan (2007–2008)                             | <ul style="list-style-type: none"> <li>All infants: 444 based on the analysis: ITT: 440</li> <li>Palivizumab (at least 3 doses): 345</li> <li>No palivizumab: 95</li> <li>Per protocol: 328</li> <li>Palivizumab (at least 3 doses): 249</li> <li>No palivizumab: 79</li> <li>Atopic asthma subpopulation: 268</li> <li>Palivizumab (at least 3 doses): 202</li> <li>No palivizumab: 66</li> </ul> | <ul style="list-style-type: none"> <li>RSV-related hospitalization rate</li> <li>&lt; 32 WGA: 986</li> <li>32–35 WGA: 957</li> <li>BPD: 500</li> <li>CHD: 102</li> </ul>                                                                                                                                                                                               | NR                  | <ul style="list-style-type: none"> <li>RSV-related hospitalization rate</li> <li>&lt; 32 WGA: 4.5%</li> <li>32–35 WGA: 1.6%</li> <li>BPD: 5.8%</li> <li>CHD: 4.3%</li> </ul>                                                                                                                                                                                           |
| Simoes et al, 2007 <sup>40</sup>          | The United States (September 2000–March 2001) | <ul style="list-style-type: none"> <li>Palivizumab: 191</li> <li>No palivizumab: 230</li> <li>RSV hospitalized: 76</li> <li>No RSV hospitalization: 154</li> </ul>                                                                                                                                                                                                                                 | <ul style="list-style-type: none"> <li>Physician-diagnosed recurrent wheezing: 7.9%</li> <li>Significant risk reduction associated with the use of palivizumab: RR: 0.49 (95% CI, 0.27–0.88)</li> <li>Caregiver-reported recurrent wheezing: 13.1%</li> <li>Significant risk reduction associated with the use of palivizumab: RR: 0.51 (95% CI, 0.33–0.78)</li> </ul> | NR                  | <ul style="list-style-type: none"> <li>Physician-diagnosed recurrent wheezing: 7.9%</li> <li>Significant risk reduction associated with the use of palivizumab: RR: 0.49 (95% CI, 0.27–0.88)</li> <li>Caregiver-reported recurrent wheezing: 13.1%</li> <li>Significant risk reduction associated with the use of palivizumab: RR: 0.51 (95% CI, 0.33–0.78)</li> </ul> |
| Paes et al, 2012 <sup>41</sup>            | Canada (October 2006–May 2010)                | <ul style="list-style-type: none"> <li>Premature infants: 4,880</li> </ul>                                                                                                                                                                                                                                                                                                                         | <ul style="list-style-type: none"> <li>RSV-related hospitalization rate</li> <li>1.3% (95% CI, 1.04–1.68)</li> <li>RSV-related ICU admission: 29.4%</li> <li>Mechanical ventilation: 7.8%</li> </ul>                                                                                                                                                                   | NR                  | <ul style="list-style-type: none"> <li>RSV-related hospitalization rate</li> <li>1.3% (95% CI, 1.04–1.68)</li> <li>RSV-related ICU admission: 29.4%</li> <li>Mechanical ventilation: 7.8%</li> </ul>                                                                                                                                                                   |
| Oncel et al, 2013 <sup>42</sup>           | Turkey (October 2011–March 2012)              | <ul style="list-style-type: none"> <li>252</li> </ul>                                                                                                                                                                                                                                                                                                                                              | <ul style="list-style-type: none"> <li>RSV-related hospitalization rate</li> <li>2.4%</li> </ul>                                                                                                                                                                                                                                                                       | NR                  | <ul style="list-style-type: none"> <li>RSV-related hospitalization rate</li> <li>2.4%</li> </ul>                                                                                                                                                                                                                                                                       |
| SUNRISE Study (NCT02282982) <sup>43</sup> | Russia (Oct 2014–May 2015)                    | <ul style="list-style-type: none"> <li>359</li> </ul>                                                                                                                                                                                                                                                                                                                                              | <ul style="list-style-type: none"> <li>RSV-related hospitalization rate</li> <li>0.3%</li> <li>No RSV-related deaths were reported</li> </ul>                                                                                                                                                                                                                          | NR                  | <ul style="list-style-type: none"> <li>RSV-related hospitalization rate</li> <li>0.3%</li> <li>No RSV-related deaths were reported</li> </ul>                                                                                                                                                                                                                          |
| Retrospective cohort study                |                                               |                                                                                                                                                                                                                                                                                                                                                                                                    |                                                                                                                                                                                                                                                                                                                                                                        |                     |                                                                                                                                                                                                                                                                                                                                                                        |
| Winterstein et al, 2011 <sup>44</sup>     | The United States (1999–2004)                 | <ul style="list-style-type: none"> <li>21,825</li> </ul>                                                                                                                                                                                                                                                                                                                                           | <ul style="list-style-type: none"> <li>RSV-related hospitalization incidence rate</li> <li>2.83 per 100 patient-seasons</li> <li>HR (ref. no palivizumab) (95% CI):</li> <li>Infants 0–1 years: 0.51 (0.38–0.68)</li> <li>Infants &gt; 1–2 years: 0.88 (0.52–1.33)</li> </ul>                                                                                          | NR                  | <ul style="list-style-type: none"> <li>RSV-related hospitalization incidence rate</li> <li>2.83 per 100 patient-seasons</li> <li>HR (ref. no palivizumab) (95% CI):</li> <li>Infants 0–1 years: 0.51 (0.38–0.68)</li> <li>Infants &gt; 1–2 years: 0.88 (0.52–1.33)</li> </ul>                                                                                          |

Supplementary Table S3 (Continued)

| Study                                    | Country/study period                        | Type of population and number of patients                                                                                                                                                                                                                                            | Key effectiveness findings                                                                                                                                                                                                                                                                                                                                                                                                                                                                                                                                                                                                                                                                                                                                                                                                                                                                                                                                                                                                                                                                                                                                                                                                                                                                                                                                                                                                                                                                                                                                                                                                                                                                                                                                                                        | Key safety findings | Methodological quality score                                                           |
|------------------------------------------|---------------------------------------------|--------------------------------------------------------------------------------------------------------------------------------------------------------------------------------------------------------------------------------------------------------------------------------------|---------------------------------------------------------------------------------------------------------------------------------------------------------------------------------------------------------------------------------------------------------------------------------------------------------------------------------------------------------------------------------------------------------------------------------------------------------------------------------------------------------------------------------------------------------------------------------------------------------------------------------------------------------------------------------------------------------------------------------------------------------------------------------------------------------------------------------------------------------------------------------------------------------------------------------------------------------------------------------------------------------------------------------------------------------------------------------------------------------------------------------------------------------------------------------------------------------------------------------------------------------------------------------------------------------------------------------------------------------------------------------------------------------------------------------------------------------------------------------------------------------------------------------------------------------------------------------------------------------------------------------------------------------------------------------------------------------------------------------------------------------------------------------------------------|---------------------|----------------------------------------------------------------------------------------|
| Buckley et al, 2010 <sup>45</sup>        | The United States (2005–2008)               | 629                                                                                                                                                                                                                                                                                  | <ul style="list-style-type: none"> <li>RSV-related hospitalization rate</li> <li>6.4%</li> </ul>                                                                                                                                                                                                                                                                                                                                                                                                                                                                                                                                                                                                                                                                                                                                                                                                                                                                                                                                                                                                                                                                                                                                                                                                                                                                                                                                                                                                                                                                                                                                                                                                                                                                                                  | NR                  | <ul style="list-style-type: none"> <li>JBIC Checklist for Cohort Studies: 7</li> </ul> |
| Elmasoudi et al, 2015 <sup>46</sup>      | Qatar (2010–2013)                           | 781                                                                                                                                                                                                                                                                                  | <ul style="list-style-type: none"> <li>RSV-related hospitalization rate</li> <li>5.4% in the first 16 mo of life</li> <li>RSV-related hospitalization incidence rate</li> <li>5.31 per 100 person-years (95% CI, 3.90–5.9)</li> </ul>                                                                                                                                                                                                                                                                                                                                                                                                                                                                                                                                                                                                                                                                                                                                                                                                                                                                                                                                                                                                                                                                                                                                                                                                                                                                                                                                                                                                                                                                                                                                                             | AEs 7%              | Not applicable                                                                         |
| Sorrentino and Powers 2000 <sup>47</sup> | The United States (September 1998–May 1999) | <ul style="list-style-type: none"> <li>All infants: 1,839</li> <li>Premature: 1,604</li> <li>BPD: 403</li> <li>CHD: 40</li> </ul>                                                                                                                                                    | <ul style="list-style-type: none"> <li>RSV-related hospitalization rate</li> <li>≤35 WGA: 2.2</li> <li>&lt; 28 WGA: 3.4%</li> <li>28–31 WGA: 2.0%</li> <li>32–35 WGA: 1.4%</li> <li>≤35 WGA without BPD: 2.1%</li> <li>BPD: 4.0%</li> </ul>                                                                                                                                                                                                                                                                                                                                                                                                                                                                                                                                                                                                                                                                                                                                                                                                                                                                                                                                                                                                                                                                                                                                                                                                                                                                                                                                                                                                                                                                                                                                                       | NR                  | <ul style="list-style-type: none"> <li>JBIC Checklist for Case Series: 5</li> </ul>    |
| Chiu et al, 2018 <sup>48</sup>           | Taiwan (July 2013–December 2015)            | <ul style="list-style-type: none"> <li>After matching by propensity score:                             <ul style="list-style-type: none"> <li>Palivizumab: 705</li> <li>○ cyanotic hs-CHD: 311</li> <li>○ No palivizumab: 705</li> <li>○ cyanotic hs-CHD: 306</li> </ul> </li> </ul> | <ul style="list-style-type: none"> <li>RSV-related hospitalization incidence rate</li> <li>(Per 1,000 person-days [95% CI]):</li> <li>All patients</li> <li>Palivizumab: 0.076 (0.048–0.121)</li> <li>No palivizumab: 0.145 (0.104–0.203)</li> <li><math>p &lt; 0.05</math></li> <li>Cyanotic hs-CHD:                             <ul style="list-style-type: none"> <li>Palivizumab: 0.093 (95% CI, 0.053–0.165)</li> <li>No palivizumab: 0.138 (95% CI, 0.087–0.219)</li> <li><math>p = 0.287</math></li> </ul> </li> <li>Cyanotic hs-CHD:                             <ul style="list-style-type: none"> <li>Palivizumab: 0.056 (95% CI, 0.025–0.124)</li> <li>No palivizumab: 0.155 (95% CI, 0.095–0.252)</li> <li><math>p = 0.028</math></li> </ul> </li> <li>RR (ref: no palivizumab) (95% CI): 0.514 (0.283–0.934)</li> <li>Acyanotic hs-CHD: 0.649 (0.293–1.439)</li> <li>Cyanotic hs-CHD: 0.350 (0.137–0.895)</li> <li>RSV-related ICU admission (per 1,000 person-days [95% CI]):</li> <li>All patients</li> <li>Palivizumab: 0.030 (95% CI, 0.014–0.062)</li> <li>No palivizumab: 0.064 (95% CI, 0.039–0.106)</li> <li>RR: 0.426 (95% CI, 0.167–1.083)</li> <li>Not statistically significant</li> <li>Acyanotic hs-CHD:                             <ul style="list-style-type: none"> <li>Palivizumab: 0.023 (95% CI, 0.05–0.072)</li> <li>No palivizumab: 0.061 (95% CI, 0.031–0.123)</li> <li>RR: 0.348 (95% CI, 0.103–1.176)</li> </ul> </li> <li>Not statistically significant</li> <li>Cyanotic hs-CHD:                             <ul style="list-style-type: none"> <li>Palivizumab: 0.037 (95% CI, 0.014–0.099)</li> <li>No palivizumab: 0.068 (95% CI, 0.032–0.142)</li> <li>RR: 0.528 (95% CI, 0.157–1.777)</li> <li>Not statistically significant</li> </ul> </li> </ul> | NR                  | <ul style="list-style-type: none"> <li>JBIC Checklist for Cohort Studies: 8</li> </ul> |
| Blake et al, 2017 <sup>49</sup>          | The United States (October 2012–March 2016) | <ul style="list-style-type: none"> <li>Pre-2014 AAP: 98</li> <li>Post-2014 AAP: 75</li> </ul>                                                                                                                                                                                        | <ul style="list-style-type: none"> <li>RSV-related hospitalization rate</li> <li>Palivizumab: 1.6%</li> <li>No palivizumab: 2.8%</li> </ul>                                                                                                                                                                                                                                                                                                                                                                                                                                                                                                                                                                                                                                                                                                                                                                                                                                                                                                                                                                                                                                                                                                                                                                                                                                                                                                                                                                                                                                                                                                                                                                                                                                                       | NR                  | <ul style="list-style-type: none"> <li>JBIC Checklist for Cohort Studies: 5</li> </ul> |

(Continued)



Supplementary Table S3 (Continued)

| Study                           | Country/study period                    | Type of population and number of patients                                                                            | Key effectiveness findings                                                                                                                                                                                                                                                                                                                                                                                                                                                                                                                                                                                                                                                                                                                                                                                                                                                                                                                                                                                                                                                                                                                                                                                                                                                                                         | Key safety findings | Methodological quality score         |
|---------------------------------|-----------------------------------------|----------------------------------------------------------------------------------------------------------------------|--------------------------------------------------------------------------------------------------------------------------------------------------------------------------------------------------------------------------------------------------------------------------------------------------------------------------------------------------------------------------------------------------------------------------------------------------------------------------------------------------------------------------------------------------------------------------------------------------------------------------------------------------------------------------------------------------------------------------------------------------------------------------------------------------------------------------------------------------------------------------------------------------------------------------------------------------------------------------------------------------------------------------------------------------------------------------------------------------------------------------------------------------------------------------------------------------------------------------------------------------------------------------------------------------------------------|---------------------|--------------------------------------|
| Wang et al, 2017 <sup>50</sup>  | Canada (2005–2015)                      | BPD: <ul style="list-style-type: none"> <li>• First year: 847</li> <li>• Second year: 450</li> </ul>                 | <ul style="list-style-type: none"> <li>• RSV-related hospitalization rate</li> <li>• First year: 2.3%</li> <li>• Second year: 3.9%</li> <li>• RSV-related ICU admission</li> <li>• First year: 22.2%</li> <li>• Second year: 26.7%</li> <li>• <math>p &gt; 0.999</math></li> <li>• Mechanical Ventilation</li> <li>• First year: 16.7%</li> <li>• Second year: 0</li> <li>• <math>p = 0.233</math></li> </ul>                                                                                                                                                                                                                                                                                                                                                                                                                                                                                                                                                                                                                                                                                                                                                                                                                                                                                                      | NR                  | JBI Checklist for Cohort Studies: 7  |
| Lee et al, 2010 <sup>51</sup>   | The United States (period not reported) | All infants: 71 <ul style="list-style-type: none"> <li>• BPD: 9</li> </ul>                                           | <ul style="list-style-type: none"> <li>• RSV-related hospitalization rate</li> <li>• 1.4%</li> <li>• Wheezing episodes:</li> <li>• 56.3% over a follow-up period of 11 years</li> </ul>                                                                                                                                                                                                                                                                                                                                                                                                                                                                                                                                                                                                                                                                                                                                                                                                                                                                                                                                                                                                                                                                                                                            | NR                  | Not applicable (Conference abstract) |
| Yeo et al, 2021 <sup>52</sup>   | Singapore (August 2012–July 2017)       | All infants: 415 <ul style="list-style-type: none"> <li>• Palivizumab: 109</li> <li>• No palivizumab: 306</li> </ul> | <ul style="list-style-type: none"> <li>• RSV-related hospitalization rate</li> <li>• In the 6 mo after discharge:</li> <li>• Palivizumab: 0.9%</li> <li>• No palivizumab: 7.2%</li> <li>• <math>p = 0.01</math>, absolute reduction = 6.3%</li> <li>• In the 12 mo after discharge:</li> <li>• Palivizumab: 2.8%</li> <li>• No palivizumab: 10.5%</li> <li>• <math>p = 0.02</math></li> <li>• RSV-related hospitalization incidence rate</li> <li>• Over 0–6 mo after discharge:</li> <li>• Palivizumab: 18.3</li> <li>• No palivizumab: 143.9</li> <li>• <math>p = 0.01</math></li> <li>• Over the 7–9 mo after discharge:</li> <li>• Palivizumab: 0</li> <li>• No palivizumab: 92.7</li> <li>• <math>p = 0.25</math></li> <li>• Over the 10–12 mo after discharge:</li> <li>• Palivizumab: 81.6</li> <li>• No palivizumab: 41.8</li> <li>• <math>p = 0.75</math></li> <li>• At 6 mo postdischarge:</li> <li>• Effectiveness of palivizumab = 90% (95% CI, 10–99)</li> <li>• Adjusted OR = 0.1 (95%CI, 0.01–0.9)</li> <li>• From 7–12 mo postdischarge:</li> <li>• Effectiveness of palivizumab = 50%</li> <li>• Adjusted OR = 0.5 (95% CI, 0.1–3.0)</li> <li>• Effectiveness calculated as (1-OR)X100</li> <li>• RSV-related ICU admission</li> <li>• Palivizumab: 0</li> <li>• No palivizumab: 15.6%</li> </ul> | NR                  | JBI Checklist for Cohort Studies: 9  |
| Diehl et al, 2010 <sup>53</sup> |                                         |                                                                                                                      | <ul style="list-style-type: none"> <li>• RSV-related hospitalization rate</li> <li>• All infants: 0.8%</li> </ul>                                                                                                                                                                                                                                                                                                                                                                                                                                                                                                                                                                                                                                                                                                                                                                                                                                                                                                                                                                                                                                                                                                                                                                                                  | NR                  | JBI Checklist for Cohort Studies: 7  |

Supplementary Table S3 (Continued)

| Study                           | Country/study period                                                                   | Type of population and number of patients                                                                                                                                                    | Key effectiveness findings                                                                                                                                                                                                                                                                                                                                                                                                                                                                                                                                                                                                                                                                                                                                                                                   | Key safety findings | Methodological quality score         |
|---------------------------------|----------------------------------------------------------------------------------------|----------------------------------------------------------------------------------------------------------------------------------------------------------------------------------------------|--------------------------------------------------------------------------------------------------------------------------------------------------------------------------------------------------------------------------------------------------------------------------------------------------------------------------------------------------------------------------------------------------------------------------------------------------------------------------------------------------------------------------------------------------------------------------------------------------------------------------------------------------------------------------------------------------------------------------------------------------------------------------------------------------------------|---------------------|--------------------------------------|
| Quek et al, 2015 <sup>54</sup>  | The United States (October 2006–April 2007)<br>Singapore (December 2011–December 2013) | All infants: 245<br>• Compliant: n = 73<br>• Noncompliant: n = 172<br><br>BPD: 57                                                                                                            | <ul style="list-style-type: none"> <li>Compliant: 0%</li> <li>Noncompliant: 1.2%</li> <li>p = 1.000</li> <li>RSV-related hospitalization rate</li> <li>Among patients that completed five doses of palivizumab: 6.3%</li> <li>Historical controls: 13.3%</li> <li>p &lt; 0.05</li> <li>RSV-related ICU admission: 33.3%</li> <li>Mechanical ventilation: 33.3%</li> </ul>                                                                                                                                                                                                                                                                                                                                                                                                                                    | NR                  | Not applicable (Conference abstract) |
| Chang et al, 2010 <sup>55</sup> | South Korea (September 2004–March 2009)                                                | BPD<br>• Palivizumab: 75<br>• No palivizumab: 53                                                                                                                                             | <ul style="list-style-type: none"> <li>RSV-related hospitalization rate</li> <li>No palivizumab: 22.6%</li> <li>Palivizumab: 4.0%</li> <li>p &lt; 0.001</li> <li>RSV-related ICU admission</li> <li>No palivizumab: 25.0%</li> <li>Palivizumab: 33.3%</li> <li>p = 0.871</li> <li>Mechanical Ventilation</li> <li>No prophylaxis: 25.0%</li> <li>Palivizumab: 33.3%</li> <li>p = 0.871</li> <li>RSV-related death</li> <li>No prophylaxis: 1.9%</li> <li>Palivizumab: 0%</li> </ul>                                                                                                                                                                                                                                                                                                                          | AEs<br>4.0%         | JBI Checklist for Cohort Studies: 7  |
| Lee et al, 2018 <sup>56</sup>   | China (Hong-Kong; 2010–2014)                                                           | All patients: 135<br>• Palivizumab: 40<br>• No palivizumab: 95<br><br>BPD<br>• Palivizumab: 37<br>• No palivizumab: 28<br>Infants born < 27 WGA<br>• Palivizumab: 23<br>• No palivizumab: 29 | <ul style="list-style-type: none"> <li>RSV-related hospitalization rate</li> <li>All patients:</li> <li>Palivizumab: 5.0%</li> <li>No palivizumab: 15.8%</li> <li>p = 0.096</li> <li>Palivizumab with BPD: 5.4%</li> <li>No palivizumab with BPD: 21.4%</li> <li>Infants born &lt; 27 WGA:</li> <li>Palivizumab: 8.7%</li> <li>No palivizumab: 33.3%</li> <li>p = 0.046</li> <li>Palivizumab with BPD: 9.1%</li> <li>No palivizumab with BPD: 35.7%</li> <li>RSV-related ICU admission</li> <li>All patients:</li> <li>Palivizumab: 50.0%</li> <li>No palivizumab: 40.0%</li> <li>Palivizumab with BPD: 50.0%</li> <li>No palivizumab with BPD: 50.0%</li> <li>Infants born &lt; 27 WGA:</li> <li>Palivizumab: 50.0%</li> <li>No palivizumab with BPD: 44.4%</li> <li>Palivizumab with BPD: 50.0%</li> </ul> | NR                  | JBI Checklist for Cohort Studies: 6  |

(Continued)

Supplementary Table S3 (Continued)

| Study                                | Country/study period          | Type of population and number of patients                                                        | Key effectiveness findings                                                                                                                                                                                                                                                                                                                                                                                                                                                                                                                                                             | Key safety findings | Methodological quality score         |
|--------------------------------------|-------------------------------|--------------------------------------------------------------------------------------------------|----------------------------------------------------------------------------------------------------------------------------------------------------------------------------------------------------------------------------------------------------------------------------------------------------------------------------------------------------------------------------------------------------------------------------------------------------------------------------------------------------------------------------------------------------------------------------------------|---------------------|--------------------------------------|
| Taylor and Baker, 2021 <sup>57</sup> | Canada                        | All infants: 423<br>• Palivizumab: 87<br>• No Palivizumab: 336                                   | <ul style="list-style-type: none"> <li>• No palivizumab with BPD: 60.0%</li> <li>• No RSV-related deaths were reported</li> <li>• RSV-related hospitalization rate</li> <li>• Within 4 wk of the previous dose: 66.7%</li> <li>• &gt; 6 wk after third and final dose: 33.3%</li> <li>• RSV-related ICU admission</li> <li>• Palivizumab: 66.7%</li> <li>• No palivizumab: 10%</li> <li>• Mechanical Ventilation</li> <li>• Palivizumab: 33.3%</li> <li>• No palivizumab: 0%</li> <li>• No RSV-related deaths were reported</li> </ul>                                                 | NR                  | JBIC Checklist for Cohort Studies: 5 |
| Krilov et al, 2014 <sup>58</sup>     | The United States (2003–2009) | All infants: 8,443<br>• < 33 WGA: 1,433<br>• 33–34 WGA: 3,182<br>• BPD: 1,242<br>• - hs-CHD: 801 | <ul style="list-style-type: none"> <li>• RSV-related hospitalization rate</li> <li>• Fully prophylaxed: 7.9%</li> <li>• Partially prophylaxed: 11.7%</li> <li>• <math>p &lt; 0.001</math></li> <li>• RSV-related hospitalization incidence rate</li> <li>• Fully prophylaxed: 10.0</li> <li>• Partially prophylaxed: 14.5</li> <li>• <math>p &lt; 0.001</math></li> </ul>                                                                                                                                                                                                              | NR                  | JBIC Checklist for Cohort Studies: 8 |
| Mitchell et al, 2014 <sup>59</sup>   | Canada (2005–2013)            | All infants: 13,624<br>• hs-CHD: 1,758                                                           | <ul style="list-style-type: none"> <li>• HR of RSV-related hospitalization</li> <li>• Adjusted HR (ref: premature only group):</li> <li>• hs-CHD: = 1.63 (95% CI, 1.09–2.439)</li> <li>• Adjusted for risk factors: living with siblings, residing with ≥ one smoker in household, family history of atopy, and multiple birth status</li> </ul>                                                                                                                                                                                                                                       | NR                  | Not applicable (Conference abstract) |
| Mitchell et al, 2015 <sup>60</sup>   | Canada (2005–2014)            | 12,137                                                                                           | <ul style="list-style-type: none"> <li>• RSV-related hospitalization</li> <li>• HR (ref: 31–32 WGA) (95% CI):</li> <li>• ≤ 26 WGA: 4.2 (2.3–7.8)</li> <li>• 27–28 WGA: 2.3 (1.2–4.1)</li> <li>• 29–30 WGA: 1.8 (1.0–3.0)</li> </ul>                                                                                                                                                                                                                                                                                                                                                    | NR                  | Not applicable (Conference abstract) |
| Resch et al, 2017 <sup>61</sup>      | Austria (2004–2012)           | All infants: 789<br>• Palivizumab: 262<br>• No palivizumab: 527                                  | <ul style="list-style-type: none"> <li>• RSV-related hospitalization rate:</li> <li>• Palivizumab: 3.1%</li> <li>• No palivizumab: 5.9%</li> <li>• <math>p = 0.042</math></li> <li>• OR (ref: no palivizumab): 0.504 (95% CI, 0.259–0.981)</li> <li>• Corresponding to a 50% relative risk reduction</li> <li>• RSV-related ICU admission</li> <li>• Palivizumab: 29%</li> <li>• No palivizumab: 23%</li> <li>• No statistical difference</li> <li>• Mechanical Ventilation</li> <li>• Palivizumab: 14%</li> <li>• No palivizumab: 19%</li> <li>• No statistical difference</li> </ul> | NR                  | JBIC Checklist for Cohort Studies: 6 |
| Fang and Wang 2018 <sup>62</sup>     | Taiwan (1999–2015)            | BPD: 535                                                                                         | <ul style="list-style-type: none"> <li>• Association between prophylactic palivizumab and later asthma development:</li> </ul>                                                                                                                                                                                                                                                                                                                                                                                                                                                         | NR                  | Not applicable (Conference abstract) |

Supplementary Table S3 (Continued)

| Study                            | Country/study period                                      | Type of population and number of patients                                                                                 | Key effectiveness findings                                                                                                                                                                                                                                                                                      | Key safety findings                                                                                                                                                                                                                                    | Methodological quality score         |
|----------------------------------|-----------------------------------------------------------|---------------------------------------------------------------------------------------------------------------------------|-----------------------------------------------------------------------------------------------------------------------------------------------------------------------------------------------------------------------------------------------------------------------------------------------------------------|--------------------------------------------------------------------------------------------------------------------------------------------------------------------------------------------------------------------------------------------------------|--------------------------------------|
| Chadha et al, 2012 <sup>63</sup> | The United States (November 2004–March 2009)              | All infants: 1,965<br>• <29 WGA: 983<br>• 29–31 WGA: 973                                                                  | <ul style="list-style-type: none"> <li>OR = 1.473 (95% CI, 0.962–2.255)</li> <li>p = 0.075</li> <li>RSV-related hospitalization incidence rate (Range per 1,000 patient-years):</li> <li>&lt; 29 WGA: 72–132</li> <li>29–31 WGA: 24–108</li> </ul>                                                              | NR                                                                                                                                                                                                                                                     | JBI Checklist for Cohort Studies: 5  |
| Paes et al, 2019 <sup>64</sup>   | Canada (2005–2017)                                        | 20,246                                                                                                                    | <ul style="list-style-type: none"> <li>RSV-related hospitalization rate</li> <li>1.3%</li> <li>RSV-related ICU admission</li> <li>28.6%</li> <li>Requirement for intubation:</li> <li>Among RSV hospitalizations: 11.7%</li> <li>Among patients receiving palivizumab for standard indication: 0.18%</li> </ul> | NR                                                                                                                                                                                                                                                     | JBI Checklist for Cohort Studies: 9  |
| Lavoie et al, 2019 <sup>65</sup> | Canada (November 2012–April 2016)                         | CHD: 325                                                                                                                  | <ul style="list-style-type: none"> <li>RSV-related hospitalization rate</li> <li>5.2%</li> </ul>                                                                                                                                                                                                                | NR                                                                                                                                                                                                                                                     | Not applicable                       |
| Paes et al, 2013 <sup>66</sup>   | Canada (2005–2012)                                        | <ul style="list-style-type: none"> <li>Premature: 8,751</li> <li>BPD: 1,048</li> <li>hs-CHD: 1,414</li> </ul>             | <ul style="list-style-type: none"> <li>RSV-related hospitalization rate</li> <li>1.89% (n = 165)</li> <li>Premature: 1.36%</li> <li>BPD: 1.64%</li> <li>hs-CHD: 2.05%</li> <li>p &lt; 0.0005</li> </ul>                                                                                                         | NR                                                                                                                                                                                                                                                     | JBI Checklist for Cohort Studies: 7  |
| Bonnet et al, 2011 <sup>67</sup> | 10 countries of the European Union<br>Period not reported | <ul style="list-style-type: none"> <li>hs-CHD: 2,018</li> <li>Cases: 1,009</li> <li>Controls: 1,009</li> </ul>            | <ul style="list-style-type: none"> <li>NR</li> </ul>                                                                                                                                                                                                                                                            | <ul style="list-style-type: none"> <li>Palivizumab users (cases) vs. controls</li> <li>SAEs of infection</li> <li>OR: 0.95</li> <li>SAEs of arrhythmia</li> <li>OR: 1.64</li> <li>Cumulative incidence of any primary SAE</li> <li>OR: 0.96</li> </ul> | Not applicable (Conference abstract) |
| Kim et al, 2016 <sup>68</sup>    | South Korea (Oct 2009–March 2015)                         | hs-CHD: 466                                                                                                               | <ul style="list-style-type: none"> <li>RSV-related hospitalization rate</li> <li>12.2%</li> <li>RSV-related ICU admission</li> <li>24.6%</li> <li>Mechanical Ventilation</li> <li>8.8%</li> </ul>                                                                                                               | NR                                                                                                                                                                                                                                                     | JBI Checklist for Case Series: 8     |
| Lin et al, 2019 <sup>69</sup>    | Taiwan (2008–2013)                                        | All infants: 2,096<br>• Palivizumab: 1,274<br>• No palivizumab: 822<br>BPD<br>• Palivizumab: 243<br>• No palivizumab: 183 | <ul style="list-style-type: none"> <li>RSV-related ICU admission</li> <li>Premature</li> <li>Palivizumab: 8.3%</li> <li>No palivizumab: 9.1%</li> <li>BPD</li> <li>Palivizumab: 0%</li> <li>No palivizumab: 68.8%</li> <li>Mechanical Ventilation</li> <li>Premature</li> </ul>                                 | NR                                                                                                                                                                                                                                                     | JBI Checklist for Cohort Studies: 6  |

(Continued)

Supplementary Table S3 (Continued)

| Study                             | Country/study period | Type of population and number of patients                                                                                             | Key effectiveness findings                                                                                                                                                                                                                                                                                                                                                                                                                                                                                                   | Key safety findings | Methodological quality score        |
|-----------------------------------|----------------------|---------------------------------------------------------------------------------------------------------------------------------------|------------------------------------------------------------------------------------------------------------------------------------------------------------------------------------------------------------------------------------------------------------------------------------------------------------------------------------------------------------------------------------------------------------------------------------------------------------------------------------------------------------------------------|---------------------|-------------------------------------|
| Claydon et al, 2019 <sup>70</sup> | Canada (2012–2016)   | hs-CHD: 325                                                                                                                           | <ul style="list-style-type: none"> <li>• Palivizumab: 8.3%</li> <li>• No palivizumab: 6.8%</li> <li>• BPD</li> <li>• Palivizumab: 0%</li> <li>• No palivizumab: 43.8%</li> <li>• RSV-related hospitalization incidence rate</li> <li>• 4.2 per 100 season-approvals (95% CI, 2.5–6.6)</li> <li>• No RSV-related deaths were reported</li> </ul>                                                                                                                                                                              | NR                  | JBI Checklist for Case Series: 7    |
| Pedraz et al, 2003 <sup>71</sup>  | Spain (1998–2002)    | Premature with or without BPD <ul style="list-style-type: none"> <li>• Palivizumab: 1,919</li> <li>• No palivizumab: 1,583</li> </ul> | <ul style="list-style-type: none"> <li>• RSV-related hospitalization rate</li> <li>• Mean over two RSV seasons:</li> <li>• Palivizumab (2000–2001, 2001–2002): 3.95%</li> <li>• No palivizumab (1998–1999, 1999–2000): 13.3%</li> <li>• Extremely premature infants (<math>\leq 28</math> WGA) (<math>p &lt; 0.0001</math>):</li> <li>• Palivizumab: 5.4%</li> <li>• No palivizumab: 13.0%</li> <li>• Infants with BPD (<math>p &lt; 0.007</math>):</li> <li>• Palivizumab: 5.5%</li> <li>• No palivizumab: 19.7%</li> </ul> | NR                  | JBI Checklist for Cohort Studies: 8 |

Abbreviations: AAP, American Academy of Pediatrics; AE, adverse event; BPD, bronchopulmonary dysplasia. CI, confidence interval; hs-CHD, hemodynamically significant congenital heart disease; JBI, Joanna Briggs Institute; NR, not reported; RSV, respiratory syncytial virus; SAE, serious adverse events; WGA, weeks gestational age.
